# Supplementary material for: What determines the Th/U atom positions inside fullerenes?
Source: Royal Society of Chemistry journal article supplement (doi:10.1039/d4qi03104k), 2025-01-01
Supplement: d4qi03104k1.pdf [file d4qi03104k1.pdf]

## Electronic supplementary information

### What determines the Th/U atom positions inside fullerenes?

Jilong Chen, Lei Lou and Peng Jin\*

School of Materials Science and Engineering, Hebei University of Technology, Tianjin 300401, China. E-mail: [china.peng.jin@gmail.com](mailto:china.peng.jin@gmail.com)

**Table S1** Summary of electronic ground state, metal valence state, metal position and the nearest metal-cage distances (M-C; Å) of all actinide mono-EMFs obtained by using different experimental/theoretical methods. The major metal site from single-crystal X-ray diffraction (XRD) is given if disordered.

| Species                                   | Method | Ground state | Metal valence | Metal position | M-C  | Ref.      |
|-------------------------------------------|--------|--------------|---------------|----------------|------|-----------|
| Th@ $T_d(2)$ -C <sub>76</sub>             | XRD    |              |               | sumanene       | 2.39 | 1         |
|                                           | M06-2X | singlet      | +4            | sumanene       | 2.46 | 2         |
|                                           | B3LYP  | singlet      | +4            | sumanene       | 2.48 | 3         |
|                                           | M06-2X | singlet      | +4            | sumanene       | 2.47 | this work |
|                                           | PBE0   | singlet      | +4            | sumanene       | 2.46 | this work |
|                                           | PBE    | singlet      | +4            | sumanene       | 2.48 | this work |
| Th@C <sub>1(17418)</sub> -C <sub>76</sub> | XRD    |              |               | PA             | 2.36 | 4         |
|                                           | B3LYP  | singlet      | +4            | PA             | 2.50 | 3         |
|                                           | M06-2X | singlet      | +4            | PA             | 2.46 | this work |
|                                           | PBE0   | singlet      | +4            | PA             | 2.46 | this work |
|                                           | PBE    | singlet      | +4            | PA             | 2.49 | this work |
| Th@ $D_{5h}(6)$ -C <sub>80</sub>          | XRD    |              |               | [6,6] bond     | 2.33 | 5         |
|                                           | PBE0   | singlet      | +4            | [6,6] bond     | 2.42 | 5         |
|                                           | M06-2X | singlet      | +4            | [6,6] bond     | 2.39 | this work |
|                                           | PBE0   | singlet      | +4            | [6,6] bond     | 2.39 | this work |
|                                           | PBE    | singlet      | +4            | [6,6] bond     | 2.41 | this work |
| Th@C <sub>1(28324)</sub> -C <sub>80</sub> | XRD    |              |               | PA             | 2.37 | 6         |
|                                           | PBE    | singlet      | +4            | PA             | 2.50 | 6         |
|                                           | M06-2X | singlet      | +4            | PA             | 2.46 | this work |
|                                           | PBE0   | singlet      | +4            | PA             | 2.46 | this work |
|                                           | PBE    | singlet      | +4            | PA             | 2.48 | this work |
| Th@C <sub>2(5)</sub> -C <sub>82</sub>     | XRD    |              |               | hexagon        | 2.31 | 7         |
|                                           | PBE    | singlet      | +4            | hexagon        | 2.46 | 7         |
|                                           | M06-2X | singlet      | +4            | hexagon        | 2.43 | this work |
|                                           | PBE0   | singlet      | +4            | hexagon        | 2.44 | this work |

|                                        |        |         |    |            |      |           |
|----------------------------------------|--------|---------|----|------------|------|-----------|
|                                        | PBE    | singlet | +4 | hexagon    | 2.46 | this work |
| Th@C <sub>3v</sub> (8)-C <sub>82</sub> | XRD    |         |    | phenalene  | 2.34 | 8         |
|                                        | BP86   | singlet | +4 | phenalene  |      | 8         |
|                                        | BLYP   | singlet | +4 | phenalene  | 2.37 | 9         |
|                                        | M06-2X | singlet | +4 | phenalene  | 2.36 | this work |
|                                        | PBE0   | singlet | +4 | phenalene  | 2.36 | this work |
|                                        | PBE    | singlet | +4 | phenalene  | 2.38 | this work |
| Th@C <sub>2v</sub> (9)-C <sub>82</sub> | XRD    |         |    | phenalene  | 2.35 | 7         |
|                                        | PBE    | singlet | +4 | phenalene  | 2.39 | 7         |
|                                        | M06-2X | singlet | +4 | phenalene  | 2.36 | this work |
|                                        | PBE0   | singlet | +4 | phenalene  | 2.36 | this work |
|                                        | PBE    | singlet | +4 | phenalene  | 2.38 | this work |
| Th@C <sub>2</sub> (8)-C <sub>84</sub>  | XRD    |         |    | sumanene   | 2.36 | 10        |
|                                        | PBE0   | singlet | +4 | sumanene   | 2.46 | 10        |
|                                        | M06-2X | singlet | +4 | sumanene   | 2.43 | this work |
|                                        | PBE0   | singlet | +4 | sumanene   | 2.44 | this work |
|                                        | PBE    | singlet | +4 | sumanene   | 2.46 | this work |
| Th@C <sub>s</sub> (15)-C <sub>84</sub> | XRD    |         |    | sumanene   | 2.27 | 10        |
|                                        | PBE0   | singlet | +4 | sumanene   | 2.46 | 10        |
|                                        | M06-2X | singlet | +4 | sumanene   | 2.43 | this work |
|                                        | PBE0   | singlet | +4 | sumanene   | 2.44 | this work |
|                                        | PBE    | singlet | +4 | sumanene   | 2.46 | this work |
| Th@C <sub>1</sub> (11)-C <sub>86</sub> | XRD    |         |    | sumanene   | 2.33 | 11        |
|                                        | BP86   | singlet | +4 | sumanene   | 2.49 | 11        |
|                                        | M06-2X | singlet | +4 | sumanene   | 2.44 | this work |
|                                        | PBE0   | singlet | +4 | sumanene   | 2.45 | this work |
|                                        | PBE    | singlet | +4 | sumanene   | 2.47 | this work |
| Th@C <sub>2</sub> (14)-C <sub>86</sub> | XRD    |         |    | sumanene   | 2.35 | 12        |
|                                        | PBE0   | singlet | +4 | sumanene   | 2.47 | 12        |
|                                        | M06-2X | singlet | +4 | sumanene   | 2.45 | this work |
|                                        | PBE0   | singlet | +4 | sumanene   | 2.45 | this work |
|                                        | PBE    | singlet | +4 | sumanene   | 2.47 | this work |
| Th@C <sub>3</sub> (18)-C <sub>86</sub> | XRD    |         |    | sumanene   | 2.40 | 12        |
|                                        | PBE0   | singlet | +4 | sumanene   | 2.46 | 12        |
|                                        | M06-2X | singlet | +4 | sumanene   | 2.43 | this work |
|                                        | PBE0   | singlet | +4 | sumanene   | 2.44 | this work |
|                                        | PBE    | singlet | +4 | sumanene   | 2.47 | this work |
| U@D <sub>3h</sub> -C <sub>74</sub>     | XRD    |         |    | [6,6] bond | 2.33 | 13        |
|                                        | BP86   | triplet | +4 | [6,6] bond | 2.39 | 13,14     |
|                                        | M06-2X | triplet | +3 | [6,6] bond | 2.45 | this work |
|                                        | PBE0   | triplet | +4 | [6,6] bond | 2.38 | this work |

|                                          |        |                 |       |                         |           |           |
|------------------------------------------|--------|-----------------|-------|-------------------------|-----------|-----------|
|                                          | PBE    | triplet         | +4    | [6,6] bond              | 2.38      | this work |
| U@C <sub>1</sub> (17418)-C <sub>76</sub> | XRD    |                 |       | PA                      | 2.29      | 6         |
|                                          | PBE    | triplet         | +4    | PA                      | 2.41      | 6         |
|                                          | M06-2X | triplet         | +3    | PA                      | 2.47      | this work |
|                                          | PBE0   | triplet         | +3    | PA                      | 2.44      | this work |
|                                          | PBE    | triplet         | +4    | PA                      | 2.42      | this work |
| U@C <sub>1</sub> (28324)-C <sub>80</sub> | XRD    |                 |       | PA                      | 2.27      | 6         |
|                                          | PBE    | triplet         | +4    | PA                      | 2.42      | 6         |
|                                          | BP86   | triplet         | +4    | PA                      | 2.43      | 14        |
|                                          | M06-2X | triplet         | +4    | PA                      | 2.39      | this work |
|                                          | PBE0   | triplet         | +4    | PA                      | 2.40      | this work |
|                                          | PBE    | triplet         | +4    | PA                      | 2.42      | this work |
| U@C <sub>s</sub> (4)-C <sub>82</sub>     | XRD    |                 |       | sumanene                | 2.38      | 15        |
|                                          | PBE    | triplet         | +4    | sumanene                | 2.40      | 15        |
|                                          | M06-2X | triplet         | +3    | sumanene                | 2.45      | this work |
|                                          | PBE0   | triplet         | +4    | sumanene                | 2.41      | this work |
|                                          | PBE    | triplet         | +4    | sumanene                | 2.42      | this work |
| U@C <sub>2</sub> (5)-C <sub>82</sub>     | XRD    |                 |       | [5,6] bond              | 2.24      | 13        |
|                                          | BP86   | triplet         | +4    | [5,6] bond              |           | 13        |
|                                          | M06-2X | triplet         | +3    | [5,6] bond              | 2.45      | this work |
|                                          | PBE0   | triplet         | +3    | [5,6] bond              | 2.42      | this work |
|                                          | PBE    | triplet         | +4    | [5,6] bond              | 2.43      | this work |
| U@C <sub>s</sub> (6)-C <sub>82</sub>     | XRD    |                 |       | phenalene               | 2.39      | 16        |
|                                          | M06-2X | triplet         | +3    | phenalene               | 2.39      | this work |
|                                          | PBE0   | triplet/quintet | +3/+3 | phenalene/<br>phenalene | 2.38/2.39 | this work |
|                                          | PBE    | triplet         | +3    | phenalene               | 2.35      | this work |
| U@C <sub>2v</sub> (9)-C <sub>82</sub>    | XRD    |                 |       | hexagon                 | 2.41      | 13        |
|                                          | BP86   | triplet         | +3    | hexagon                 |           | 13        |
|                                          | BLYP   | triplet         | +3    | hexagon                 | 2.43      | 9         |
|                                          | M06-2X | triplet         | +3    | hexagon                 | 2.39      | this work |
|                                          | PBE0   | triplet/quintet | +3/+3 | hexagon/<br>hexagon     | 2.38/2.40 | this work |
|                                          | PBE    | triplet         | +3    | hexagon                 | 2.37      | this work |
| U@C <sub>2</sub> (8)-C <sub>84</sub>     | XRD    |                 |       | sumanene                | 2.28      | 16        |
|                                          | M06-2X | triplet         | +3    | sumanene                | 2.44      | this work |
|                                          | PBE0   | triplet         | +4    | sumanene                | 2.40      | this work |
|                                          | PBE    | triplet         | +4    | sumanene                | 2.41      | this work |
| U@C <sub>s</sub> (15)-C <sub>84</sub>    | XRD    |                 |       | sumanene                | 2.32      | 16        |
|                                          | M06-2X | triplet         | +3    | sumanene                | 2.43      | this work |
|                                          | PBE0   | triplet         | +4    | sumanene                | 2.40      | this work |

|                                       |        |                 |       |                       |           |           |
|---------------------------------------|--------|-----------------|-------|-----------------------|-----------|-----------|
| U@D <sub>2</sub> (21)-C <sub>84</sub> | PBE    | triplet         | +4    | sumanene              | 2.41      | this work |
|                                       | XRD    |                 |       | hexagon               | 2.20      | 17        |
|                                       | M06-2X | quintet         | +3    | hexagon               | 2.41      | this work |
|                                       | PBE0   | triplet/quintet | +3/+3 | hexagon/<br>hexagon   | 2.40/2.40 | this work |
|                                       | PBE    | triplet         | +3    | hexagon               | 2.38      | this work |
| U@C <sub>1</sub> (11)-C <sub>86</sub> | XRD    |                 |       | sumanene              | 2.31      | 17        |
|                                       | M06-2X | triplet/quintet | +3/+3 | sumanene/<br>sumanene | 2.41/2.48 | this work |
|                                       | PBE0   | triplet         | +4    | sumanene              | 2.41      | this work |
|                                       | PBE    | triplet         | +4    | sumanene              | 2.42      | this work |
| U@C <sub>1</sub> (12)-C <sub>86</sub> | XRD    |                 |       | sumanene              | 2.28      | 16        |
|                                       | M06-2X | triplet         | +3    | sumanene              | 2.35      | this work |
|                                       | PBE0   | triplet         | +3    | sumanene              | 2.43      | this work |
|                                       | PBE    | triplet         | +4    | sumanene              | 2.42      | this work |
| U@C <sub>s</sub> (15)-C <sub>86</sub> | XRD    |                 |       | hexagon               | 2.21      | 17        |
|                                       | M06-2X | triplet         | +3    | hexagon               | 2.41      | this work |
|                                       | PBE0   | triplet         | +3    | hexagon               | 2.40      | this work |
|                                       | PBE    | triplet         | +4    | hexagon               | 2.38      | this work |

**Table S2** Relative energies ( $\Delta E$ , kcal/mol) of all actinide mono-EMFs with different spin multiplicities ( $M$ ) at different theoretical levels.

| Species                                   | $M$      | M06-2X     | PBE0       | PBE        |
|-------------------------------------------|----------|------------|------------|------------|
| Th@T <sub>d</sub> (2)-C <sub>76</sub>     | <b>1</b> | <b>0.0</b> | <b>0.0</b> | <b>0.0</b> |
|                                           | 3        | 17.0       | 13.0       | 10.5       |
| Th@C <sub>1</sub> (17418)-C <sub>76</sub> | <b>1</b> | <b>0.0</b> | <b>0.0</b> | <b>0.0</b> |
|                                           | 3        | 20.3       | 23.9       | 19.8       |
| Th@D <sub>5h</sub> (6)-C <sub>80</sub>    | <b>1</b> | <b>0.0</b> | <b>0.0</b> | <b>0.0</b> |
|                                           | 3        | 15.7       | 12.0       | 10.4       |
| Th@C <sub>1</sub> (28324)-C <sub>80</sub> | <b>1</b> | <b>0.0</b> | <b>0.0</b> | <b>0.0</b> |
|                                           | 3        | 32.2       | 27.1       | 23.2       |
| Th@C <sub>2</sub> (5)-C <sub>82</sub>     | <b>1</b> | <b>0.0</b> | <b>0.0</b> | <b>0.0</b> |
|                                           | 3        | 13.9       | 10.7       | 9.2        |
| Th@C <sub>3v</sub> (8)-C <sub>82</sub>    | <b>1</b> | <b>0.0</b> | <b>0.0</b> | <b>0.0</b> |
|                                           | 3        | 12.4       | 25.7       | 21.9       |
| Th@C <sub>2v</sub> (9)-C <sub>82</sub>    | <b>1</b> | <b>0.0</b> | <b>0.0</b> | <b>0.0</b> |
|                                           | 3        | 22.3       | 18.2       | 14.7       |

|                                          |          |            |            |            |
|------------------------------------------|----------|------------|------------|------------|
| Th@C <sub>2</sub> (8)-C <sub>84</sub>    | <b>1</b> | <b>0.0</b> | <b>0.0</b> | <b>0.0</b> |
|                                          | 3        | 23.8       | 20.0       | 17.8       |
| Th@C <sub>s</sub> (15)-C <sub>84</sub>   | <b>1</b> | <b>0.0</b> | <b>0.0</b> | <b>0.0</b> |
|                                          | 3        | 16.4       | 12.6       | 10.5       |
| Th@C <sub>1</sub> (11)-C <sub>86</sub>   | <b>1</b> | <b>0.0</b> | <b>0.0</b> | <b>0.0</b> |
|                                          | 3        | 26.0       | 22.2       | 19.4       |
| Th@C <sub>2</sub> (14)-C <sub>86</sub>   | <b>1</b> | <b>0.0</b> | <b>0.0</b> | <b>0.0</b> |
|                                          | 3        | 17.1       | 13.7       | 11.8       |
| Th@C <sub>3</sub> (18)-C <sub>86</sub>   | <b>1</b> | <b>0.0</b> | <b>0.0</b> | <b>0.0</b> |
|                                          | 3        | 24.7       | 20.7       | 18.1       |
| U@D <sub>3h</sub> -C <sub>74</sub>       | <b>3</b> | <b>0.0</b> | <b>0.0</b> | <b>0.0</b> |
|                                          | 5        | 1.9        | 5.0        | 9.0        |
| U@C <sub>1</sub> (17418)-C <sub>76</sub> | <b>3</b> | <b>0.0</b> | <b>0.0</b> | <b>0.0</b> |
|                                          | 5        | 2.7        | 1.8        | 7.1        |
| U@C <sub>1</sub> (28324)-C <sub>80</sub> | <b>3</b> | <b>0.0</b> | <b>0.0</b> | <b>0.0</b> |
|                                          | 5        | 4.1        | 4.5        | 12.3       |
| U@C <sub>s</sub> (4)-C <sub>82</sub>     | <b>3</b> | <b>0.0</b> | <b>0.0</b> | <b>0.0</b> |
|                                          | 5        | 8.5        | 3.1        | 9.2        |
| U@C <sub>2</sub> (5)-C <sub>82</sub>     | <b>3</b> | <b>0.0</b> | <b>0.0</b> | <b>0.0</b> |
|                                          | 5        | 3.4        | 4.1        | 7.6        |
| U@C <sub>s</sub> (6)-C <sub>82</sub>     | <b>3</b> | <b>0.0</b> | <b>0.1</b> | <b>0.0</b> |
|                                          | <b>5</b> | 1.3        | <b>0.0</b> | 1.2        |
| U@C <sub>2v</sub> (9)-C <sub>82</sub>    | <b>3</b> | <b>0.0</b> | <b>0.2</b> | <b>0.0</b> |
|                                          | <b>5</b> | 3.3        | <b>0.0</b> | 2.8        |
| U@C <sub>2</sub> (8)-C <sub>84</sub>     | <b>3</b> | <b>0.0</b> | <b>0.0</b> | <b>0.0</b> |
|                                          | 5        | 2.1        | 7.1        | 12.1       |
| U@C <sub>s</sub> (15)-C <sub>84</sub>    | <b>3</b> | <b>0.0</b> | <b>0.0</b> | <b>0.0</b> |
|                                          | 5        | 5.3        | 6.3        | 11.3       |
| U@D <sub>2</sub> (21)-C <sub>84</sub>    | <b>3</b> | 9.0        | <b>0.0</b> | <b>0.0</b> |
|                                          | <b>5</b> | <b>0.0</b> | 0.5        | 4.1        |
| U@C <sub>1</sub> (11)-C <sub>86</sub>    | <b>3</b> | <b>0.1</b> | <b>0.0</b> | <b>0.0</b> |
|                                          | <b>5</b> | <b>0.0</b> | 7.2        | 11.7       |
| U@C <sub>1</sub> (12)-C <sub>86</sub>    | <b>3</b> | <b>0.0</b> | <b>0.0</b> | <b>0.0</b> |

|                                       |          |            |            |            |
|---------------------------------------|----------|------------|------------|------------|
|                                       | 5        | 6.0        | 5.0        | 8.1        |
|                                       | <b>3</b> | <b>0.0</b> | <b>0.0</b> | <b>0.0</b> |
| U@C <sub>s</sub> (15)-C <sub>86</sub> | 5        | 3.0        | 1.9        | 9.1        |

**Table S3** Computed and experimental first redox potentials (V vs. Fc/Fc<sup>+</sup>) and electrochemical bandgaps of all 13 U-based mono-EMFs. The COSMO model was used to consider the solvent effect.

| Species                                  | Method (o-DCB) | <sup>ox</sup> E <sub>1</sub> | <sup>red</sup> E <sub>1</sub> | ΔE <sub>gap</sub> | Ref.      |
|------------------------------------------|----------------|------------------------------|-------------------------------|-------------------|-----------|
| U@D <sub>3h</sub> -C <sub>74</sub>       | Exp.           | 0.01                         | -1.05                         | 1.06              | 13        |
|                                          | M06-2X         | -0.13                        | -0.81                         | 0.68              | this work |
| U@C <sub>1</sub> (17418)-C <sub>76</sub> | Exp.           | 0.14                         | -0.72                         | 0.86              | 6         |
|                                          | M06-2X         | 0.17                         | -0.86                         | 1.03              | this work |
| U@C <sub>1</sub> (28324)-C <sub>80</sub> | Exp.           | 0.28                         | -0.57                         | 0.85              | 6         |
|                                          | M06-2X         | 0.11                         | -0.86                         | 0.97              | this work |
| U@C <sub>s</sub> (4)-C <sub>82</sub>     | Exp.           | N/A                          | N/A                           | N/A               | 15        |
|                                          | M06-2X         | -0.01                        | -0.95                         | 0.94              | this work |
| U@C <sub>2</sub> (5)-C <sub>82</sub>     | Exp.           | 0.11                         | -0.67                         | 0.78              | 13        |
|                                          | M06-2X         | -0.09                        | -0.81                         | 0.72              | this work |
| U@C <sub>s</sub> (6)-C <sub>82</sub>     | Exp.           | 0.04                         | -0.41                         | 0.45              | 16        |
|                                          | M06-2X         | 0.16                         | -0.31                         | 0.47              | this work |
| U@C <sub>2v</sub> (9)-C <sub>82</sub>    | Exp.           | 0.10                         | -0.43                         | 0.53              | 13        |
|                                          | M06-2X         | 0.17                         | -0.69                         | 0.86              | this work |
| U@C <sub>2</sub> (8)-C <sub>84</sub>     | Exp.           | 0.08                         | -0.75                         | 0.83              | 16        |
|                                          | M06-2X         | 0.05                         | -0.98                         | 1.03              | this work |
| U@C <sub>s</sub> (15)-C <sub>84</sub>    | Exp.           | 0.12                         | -0.71                         | 0.83              | 16        |
|                                          | M06-2X         | 0.02                         | -0.57                         | 0.59              | this work |
| U@D <sub>2</sub> (21)-C <sub>84</sub>    | Exp.           | 0.07                         | -0.68                         | 0.75              | 17        |
|                                          | M06-2X         | 0.04                         | -0.60                         | 0.64              | this work |
| U@C <sub>1</sub> (11)-C <sub>86</sub>    | Exp.           | 0.18                         | -0.69                         | 0.87              | 17        |
|                                          | M06-2X         | 0.04                         | -0.59                         | 0.63              | this work |
| U@C <sub>1</sub> (12)-C <sub>86</sub>    | Exp.           | 0.08                         | -0.78                         | 0.86              | 16        |
|                                          | M06-2X         | -0.02                        | -0.76                         | 0.74              | this work |
| U@C <sub>s</sub> (15)-C <sub>86</sub>    | Exp.           | 0.24                         | -0.60                         | 0.84              | 17        |
|                                          | M06-2X         | 0.29                         | -0.52                         | 0.81              | this work |

**Table S4** Encapsulation energies (*E<sub>e</sub>*, kcal/mol) of all actinide mono-EMFs.

| Species                               | <i>E<sub>e</sub></i> | Species                            | <i>E<sub>e</sub></i> |
|---------------------------------------|----------------------|------------------------------------|----------------------|
| Th@T <sub>d</sub> (2)-C <sub>76</sub> | 256.2                | U@D <sub>3h</sub> -C <sub>74</sub> | 151.5                |

|                                           |       |                                          |       |
|-------------------------------------------|-------|------------------------------------------|-------|
| Th@C <sub>1</sub> (17418)-C <sub>76</sub> | 264.0 | U@C <sub>1</sub> (17418)-C <sub>76</sub> | 172.6 |
| Th@D <sub>5h</sub> (6)-C <sub>80</sub>    | 257.5 | U@C <sub>1</sub> (28324)-C <sub>80</sub> | 177.6 |
| Th@C <sub>1</sub> (28324)-C <sub>80</sub> | 272.4 | U@C <sub>s</sub> (4)-C <sub>82</sub>     | 140.5 |
| Th@C <sub>2</sub> (5)-C <sub>82</sub>     | 231.3 | U@C <sub>2</sub> (5)-C <sub>82</sub>     | 142.4 |
| Th@C <sub>3v</sub> (8)-C <sub>82</sub>    | 270.1 | U@C <sub>s</sub> (6)-C <sub>82</sub>     | 162.9 |
| Th@C <sub>2v</sub> (9)-C <sub>82</sub>    | 255.5 | U@C <sub>2v</sub> (9)-C <sub>82</sub>    | 176.7 |
| Th@C <sub>2</sub> (8)-C <sub>84</sub>     | 239.5 | U@C <sub>2</sub> (8)-C <sub>84</sub>     | 148.4 |
| Th@C <sub>s</sub> (15)-C <sub>84</sub>    | 224.1 | U@C <sub>s</sub> (15)-C <sub>84</sub>    | 133.7 |
| Th@C <sub>1</sub> (11)-C <sub>86</sub>    | 239.4 | U@D <sub>2</sub> (21)-C <sub>84</sub>    | 150.5 |
| Th@C <sub>2</sub> (14)-C <sub>86</sub>    | 248.2 | U@C <sub>1</sub> (11)-C <sub>86</sub>    | 144.8 |
| Th@C <sub>3</sub> (18)-C <sub>86</sub>    | 236.3 | U@C <sub>1</sub> (12)-C <sub>86</sub>    | 147.0 |
|                                           |       | U@C <sub>s</sub> (15)-C <sub>86</sub>    | 151.1 |

**Table S5** Calculated metal charges (CM5) of all actinide mono-EMFs at different theoretical levels.

| Species                                   | M06-2X | PBE0  | PBE   | Species                                  | M06-2X | PBE0  | PBE   |
|-------------------------------------------|--------|-------|-------|------------------------------------------|--------|-------|-------|
| Th@T <sub>d</sub> (2)-C <sub>76</sub>     | +1.61  | +1.56 | +1.44 | U@D <sub>3h</sub> -C <sub>74</sub>       | +1.29  | +1.33 | +1.26 |
| Th@C <sub>1</sub> (17418)-C <sub>76</sub> | +1.61  | +1.56 | +1.45 | U@C <sub>1</sub> (17418)-C <sub>76</sub> | +1.29  | +1.33 | +1.29 |
| Th@D <sub>5h</sub> (6)-C <sub>80</sub>    | +1.63  | +1.57 | +1.46 | U@C <sub>1</sub> (28324)-C <sub>80</sub> | +1.46  | +1.41 | +1.30 |
| Th@C <sub>1</sub> (28324)-C <sub>80</sub> | +1.60  | +1.55 | +1.44 | U@C <sub>s</sub> (4)-C <sub>82</sub>     | +1.33  | +1.40 | +1.28 |
| Th@C <sub>2</sub> (5)-C <sub>82</sub>     | +1.60  | +1.55 | +1.43 | U@C <sub>2</sub> (5)-C <sub>82</sub>     | +1.30  | +1.31 | +1.28 |
| Th@C <sub>3v</sub> (8)-C <sub>82</sub>    | +1.60  | +1.55 | +1.44 | U@C <sub>s</sub> (6)-C <sub>82</sub>     | +1.24  | +1.21 | +1.20 |
| Th@C <sub>2v</sub> (9)-C <sub>82</sub>    | +1.59  | +1.54 | +1.42 | U@C <sub>2v</sub> (9)-C <sub>82</sub>    | +1.24  | +1.22 | +1.22 |
| Th@C <sub>2</sub> (8)-C <sub>84</sub>     | +1.59  | +1.54 | +1.42 | U@C <sub>2</sub> (8)-C <sub>84</sub>     | +1.29  | +1.33 | +1.27 |
| Th@C <sub>s</sub> (15)-C <sub>84</sub>    | +1.58  | +1.53 | +1.42 | U@C <sub>s</sub> (15)-C <sub>84</sub>    | +1.32  | +1.34 | +1.27 |
| Th@C <sub>1</sub> (11)-C <sub>86</sub>    | +1.59  | +1.54 | +1.43 | U@D <sub>2</sub> (21)-C <sub>84</sub>    | +1.23  | +1.23 | +1.23 |
| Th@C <sub>2</sub> (14)-C <sub>86</sub>    | +1.60  | +1.55 | +1.43 | U@C <sub>1</sub> (11)-C <sub>86</sub>    | +1.43  | +1.35 | +1.26 |
| Th@C <sub>3</sub> (18)-C <sub>86</sub>    | +1.59  | +1.54 | +1.42 | U@C <sub>1</sub> (12)-C <sub>86</sub>    | +1.27  | +1.29 | +1.27 |
|                                           |        |       |       | U@C <sub>s</sub> (15)-C <sub>86</sub>    | +1.26  | +1.25 | +1.23 |

**Table S6** Spin population values of all U-based mono-EMFs.

| Species                                  | Spin population |
|------------------------------------------|-----------------|
| U@D <sub>3h</sub> -C <sub>74</sub>       | 3.00            |
| U@C <sub>1</sub> (17418)-C <sub>76</sub> | 3.02            |

|                                          |      |
|------------------------------------------|------|
| U@C <sub>1</sub> (28324)-C <sub>80</sub> | 2.44 |
| U@C <sub>s</sub> (4)-C <sub>82</sub>     | 2.88 |
| U@C <sub>2</sub> (5)-C <sub>82</sub>     | 2.99 |
| U@C <sub>s</sub> (6)-C <sub>82</sub>     | 3.14 |
| U@C <sub>2v</sub> (9)-C <sub>82</sub>    | 3.14 |
| U@C <sub>2</sub> (8)-C <sub>84</sub>     | 2.99 |
| U@C <sub>s</sub> (15)-C <sub>84</sub>    | 2.92 |
| U@D <sub>2</sub> (21)-C <sub>84</sub>    | 3.17 |
| U@C <sub>1</sub> (11)-C <sub>86</sub>    | 3.15 |
| U@C <sub>1</sub> (12)-C <sub>86</sub>    | 3.05 |
| U@C <sub>s</sub> (15)-C <sub>86</sub>    | 3.05 |

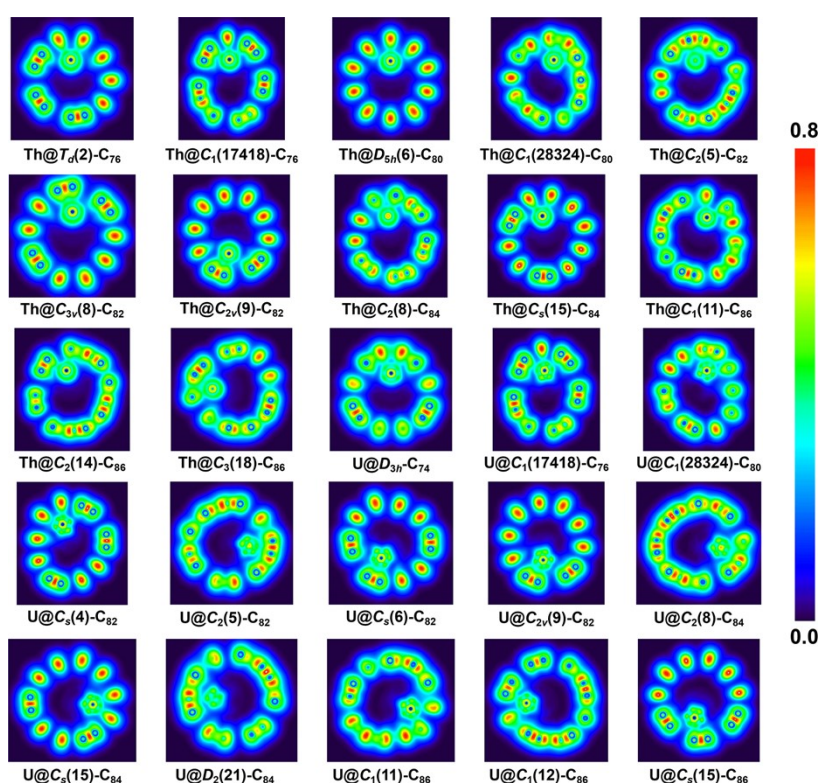

**Fig. S1** LOL plots on a plane containing metal atom for all actinide mono-EMFs.

**Table S7** IQA interaction energy ( $V_{\text{Int}}$ , kcal/mol), coulombic energy ( $V_{\text{C}}$ , kcal/mol), and interatomic exchange-correlation ( $V_{\text{XC}}$ , kcal/mol) components between metal and the nearest neighbor carbon atoms in actinide mono-EMFs.

| Species                               | $V_{\text{Int}}(\text{M,C})$ | $V_{\text{C}}(\text{M,C})$ | $V_{\text{XC}}(\text{M,C})$ | Species                            | $V_{\text{Int}}(\text{M,C})$ | $V_{\text{C}}(\text{M,C})$ | $V_{\text{XC}}(\text{M,C})$ |
|---------------------------------------|------------------------------|----------------------------|-----------------------------|------------------------------------|------------------------------|----------------------------|-----------------------------|
| Th@T <sub>d</sub> (2)-C <sub>76</sub> | -86.0                        | -48.4                      | -37.6                       | U@D <sub>3h</sub> -C <sub>74</sub> | -75.8                        | -39.7                      | -36.1                       |



|                                           |       |       |       |                                          |       |       |       |
|-------------------------------------------|-------|-------|-------|------------------------------------------|-------|-------|-------|
| Th@C <sub>1</sub> (17418)-C <sub>76</sub> | -79.9 | -44.2 | -35.7 | U@C <sub>1</sub> (17418)-C <sub>76</sub> | -64.6 | -31.8 | -32.8 |
| Th@D <sub>5h</sub> -C <sub>80</sub>       | -97.3 | -51.5 | -45.8 | U@C <sub>1</sub> (28324)-C <sub>80</sub> | -80.2 | -37.2 | -43.0 |
| Th@C <sub>1</sub> (28324)-C <sub>80</sub> | -87.1 | -49.2 | -37.9 | U@C <sub>s</sub> (4)-C <sub>82</sub>     | -72.6 | -34.8 | -37.8 |
| Th@C <sub>2</sub> (5)-C <sub>82</sub>     | -87.9 | -47.7 | -40.2 | U@C <sub>2</sub> (5)-C <sub>82</sub>     | -72.0 | -35.2 | -36.8 |
| Th@C <sub>3v</sub> (8)-C <sub>82</sub>    | -90.9 | -43.6 | -47.3 | U@C <sub>s</sub> (6)-C <sub>82</sub>     | -67.8 | -28.0 | -39.8 |
| Th@C <sub>2v</sub> (9)-C <sub>82</sub>    | -94.8 | -45.9 | -48.9 | U@C <sub>2v</sub> (9)-C <sub>82</sub>    | -74.2 | -41.3 | -32.9 |
| Th@C <sub>2</sub> (8)-C <sub>84</sub>     | -96.5 | -53.8 | -42.7 | U@C <sub>2</sub> (8)-C <sub>84</sub>     | -79.0 | -39.5 | -39.5 |
| Th@C <sub>s</sub> (15)-C <sub>84</sub>    | -92.7 | -51.2 | -41.4 | U@C <sub>s</sub> (15)-C <sub>84</sub>    | -77.1 | -36.9 | -40.2 |
| Th@C <sub>1</sub> (11)-C <sub>86</sub>    | -86.5 | -47.5 | -39.0 | U@D <sub>2</sub> (21)-C <sub>84</sub>    | -75.0 | -35.8 | -39.2 |
| Th@C <sub>2</sub> (14)-C <sub>86</sub>    | -86.9 | -48.1 | -38.8 | U@C <sub>1</sub> (11)-C <sub>86</sub>    | -75.5 | -34.3 | -41.2 |
| Th@C <sub>3</sub> (18)-C <sub>86</sub>    | -95.8 | -53.2 | -42.6 | U@C <sub>1</sub> (12)-C <sub>86</sub>    | -69.3 | -34.8 | -34.6 |
|                                           |       |       |       | U@C <sub>s</sub> (15)-C <sub>86</sub>    | -79.0 | -37.3 | -41.7 |

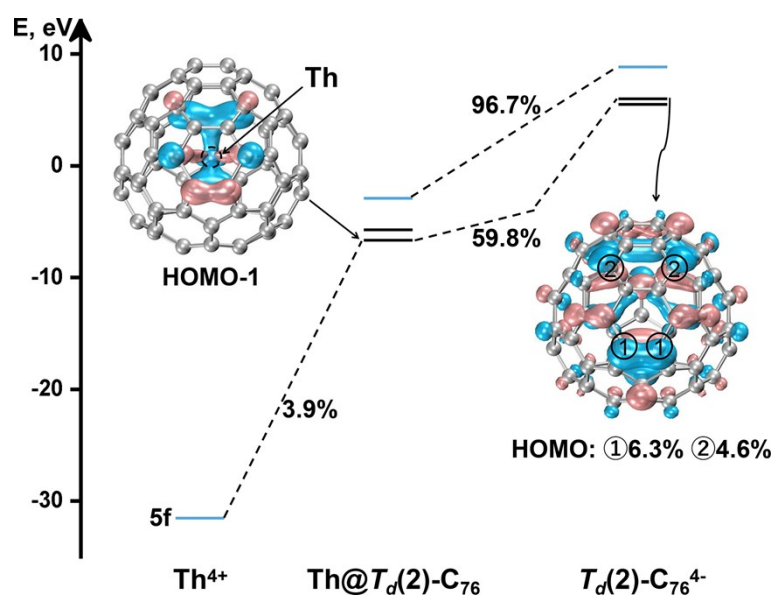

**Fig. S2** Orbital interaction diagrams based on metal cation and cage anion of S9

Th@ $T_d(2)$ -C<sub>76</sub>. For clarity, only the occupied molecular orbitals with significant overlaps between metal and cage are shown.

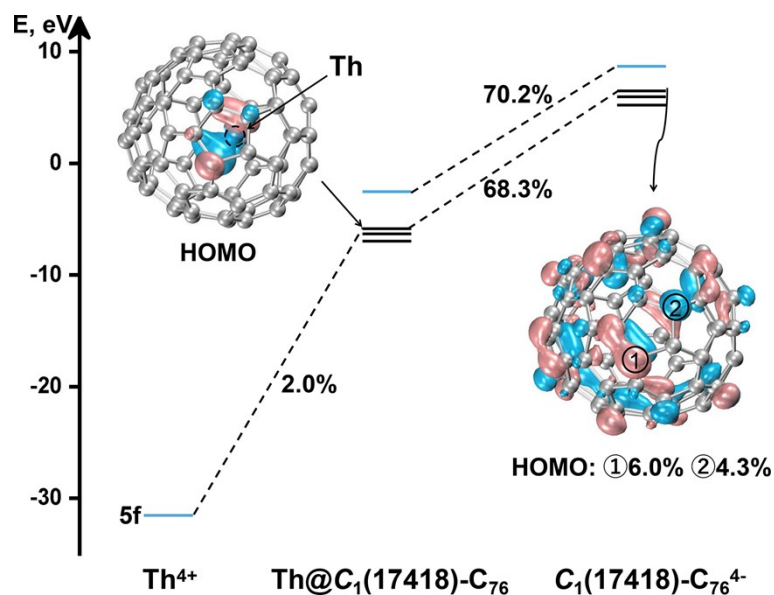

**Fig. S3** Orbital interaction diagrams based on metal cation and cage anion of Th@C<sub>1</sub>(17418)-C<sub>76</sub>. For clarity, only the occupied molecular orbitals with significant overlaps between metal and cage are shown.

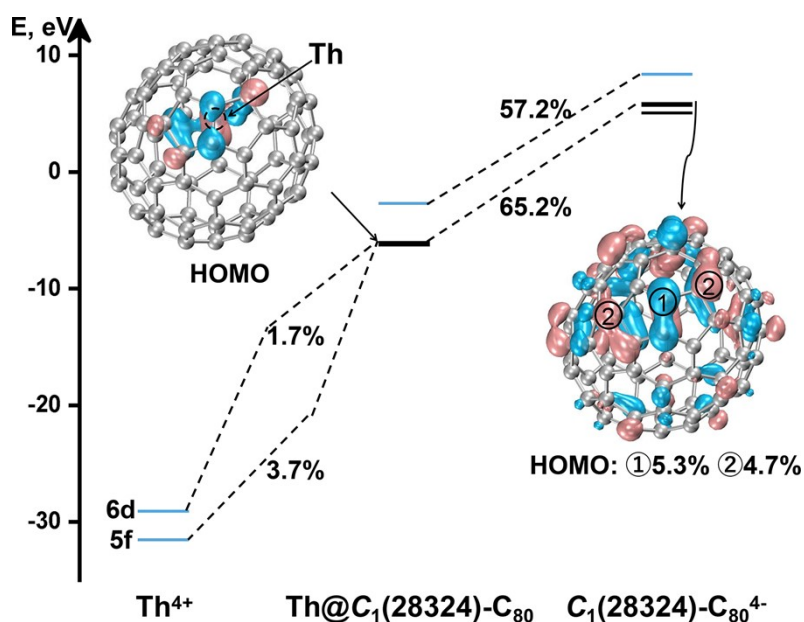

**Fig. S4** Orbital interaction diagrams based on metal cation and cage anion of Th@C<sub>1</sub>(28324)-C<sub>80</sub>. For clarity, only the occupied molecular orbitals with significant overlaps between metal and cage are shown.

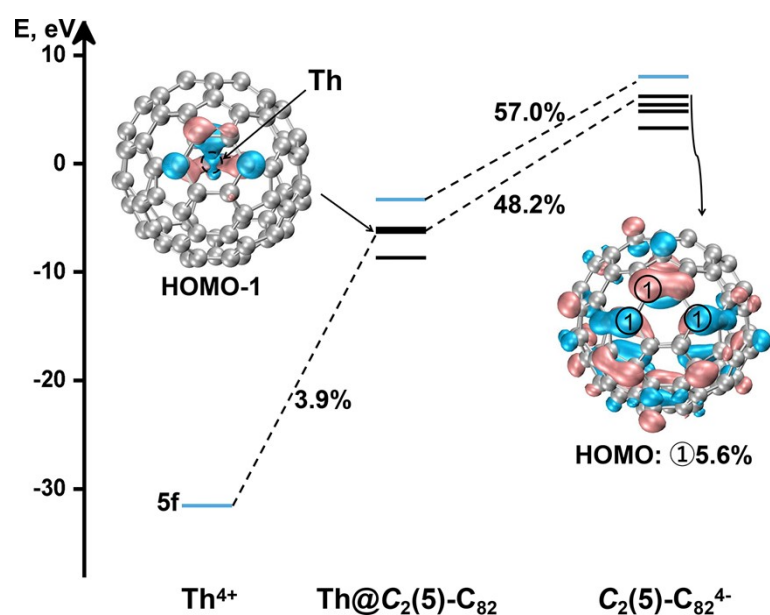

**Fig. S5** Orbital interaction diagrams based on metal cation and cage anion of  $\text{Th@C}_2(5)\text{-C}_{82}$ . For clarity, only the occupied molecular orbitals with significant overlaps between metal and cage are shown.

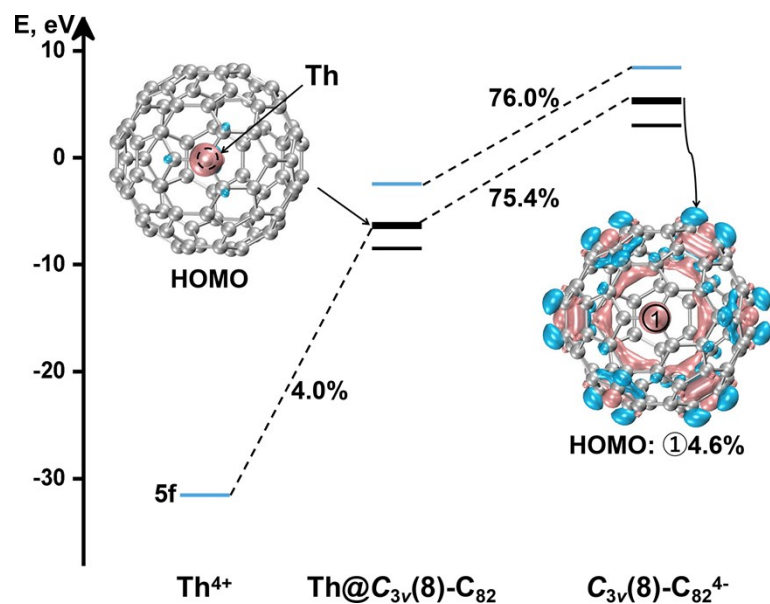

**Fig. S6** Orbital interaction diagrams based on metal cation and cage anion of  $\text{Th@C}_{3v}(8)\text{-C}_{82}$ . For clarity, only the occupied molecular orbitals with significant

overlaps between metal and cage are shown.

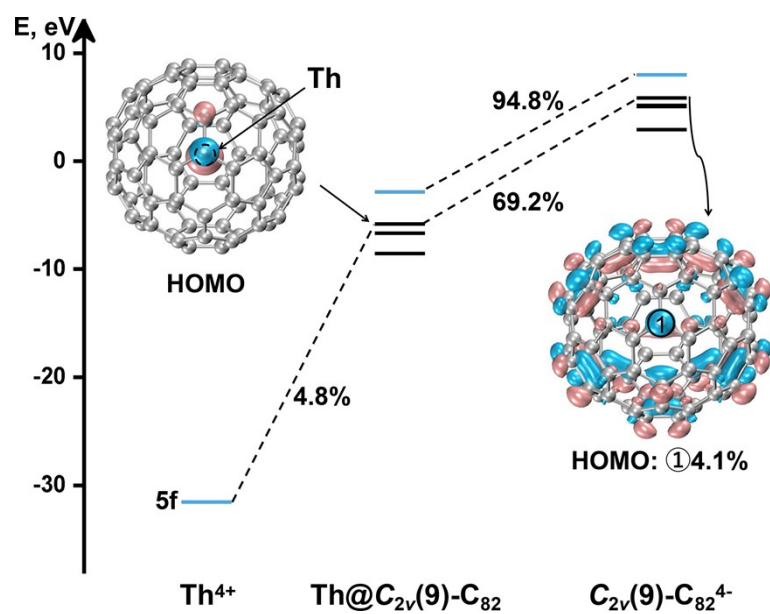

**Fig. S7** Orbital interaction diagrams based on metal cation and cage anion of  $\text{Th}@C_{2v}(9)\text{-C}_{82}$ . For clarity, only the occupied molecular orbitals with significant overlaps between metal and cage are shown.

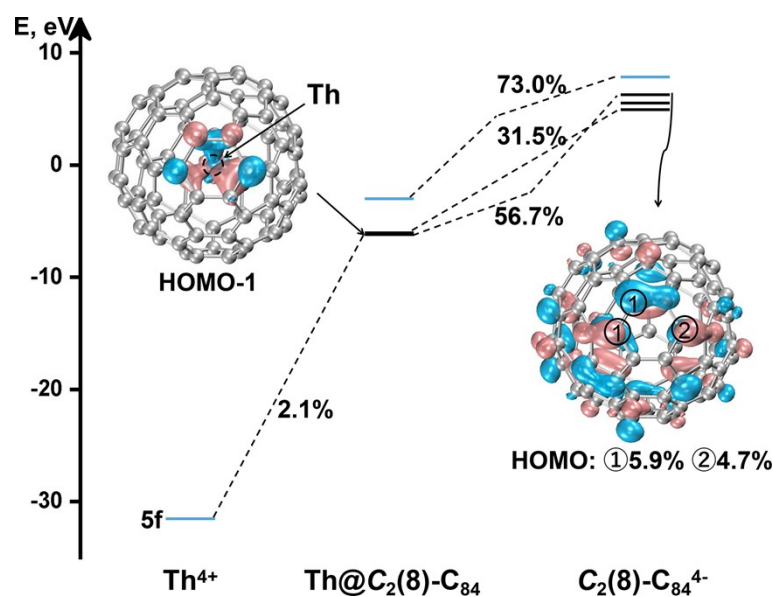

**Fig. S8** Orbital interaction diagrams based on metal cation and cage anion of  $\text{Th}@C_2(8)\text{-C}_{84}$ . For clarity, only the occupied molecular orbitals with significant overlaps between metal and cage are shown.

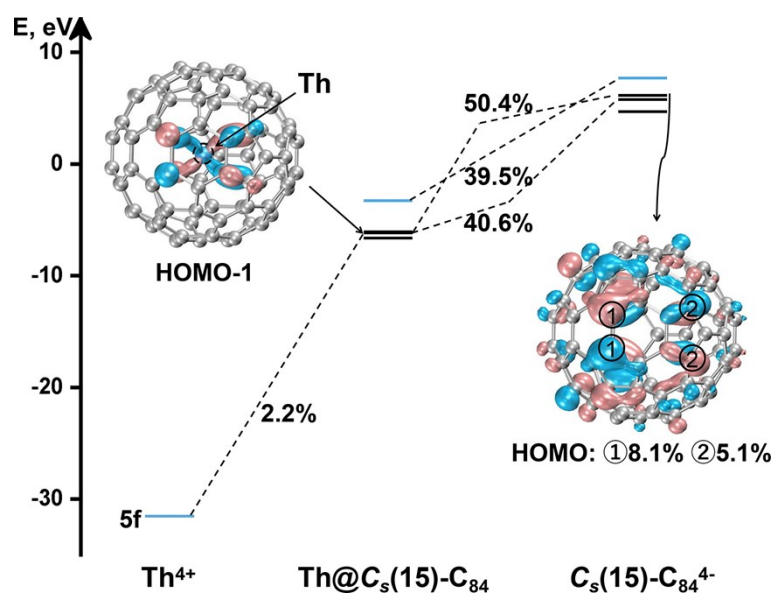

**Fig. S9** Orbital interaction diagrams based on metal cation and cage anion of  $\text{Th}@C_s(15)\text{-C}_{84}$ . For clarity, only the occupied molecular orbitals with significant overlaps between metal and cage are shown.

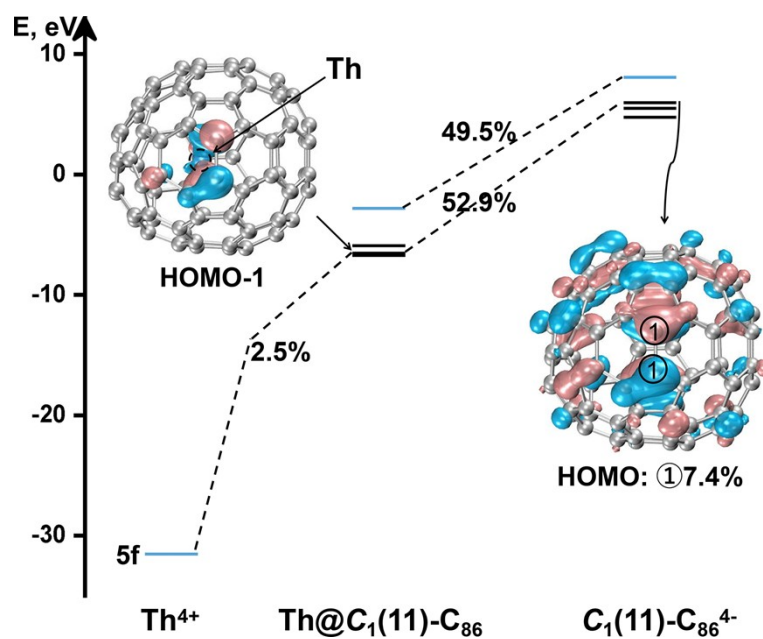

**Fig. S10** Orbital interaction diagrams based on metal cation and cage anion of

Th@C<sub>1</sub>(11)-C<sub>86</sub>. For clarity, only the occupied molecular orbitals with significant overlaps between metal and cage are shown.

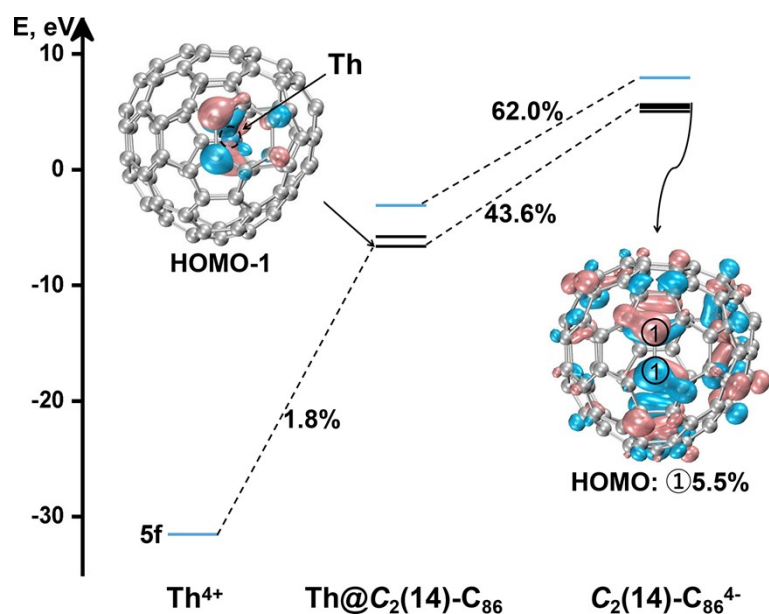

**Fig. S11** Orbital interaction diagrams based on metal cation and cage anion of Th@C<sub>2</sub>(14)-C<sub>86</sub>. For clarity, only the occupied molecular orbitals with significant overlaps between metal and cage are shown.

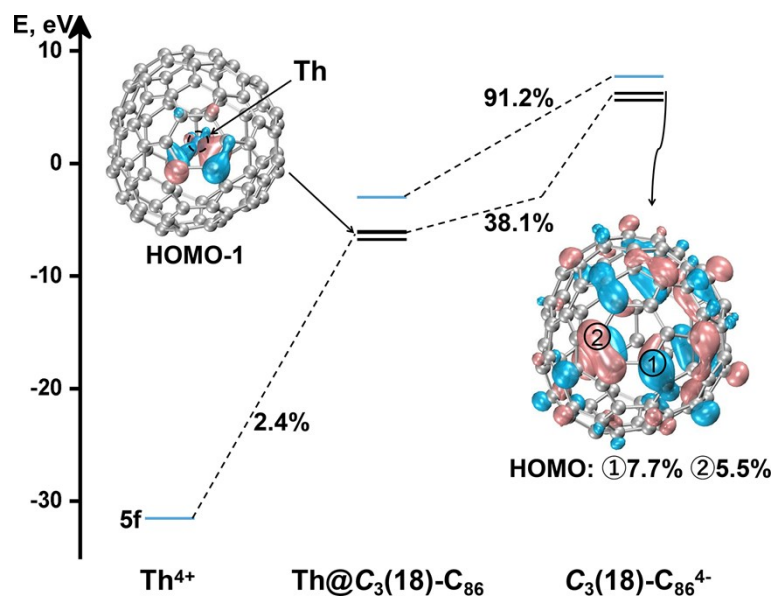

**Fig. S12** Orbital interaction diagrams based on metal cation and cage anion of Th@C<sub>3</sub>(18)-C<sub>86</sub>. For clarity, only the occupied molecular orbitals with significant

overlaps between metal and cage are shown.

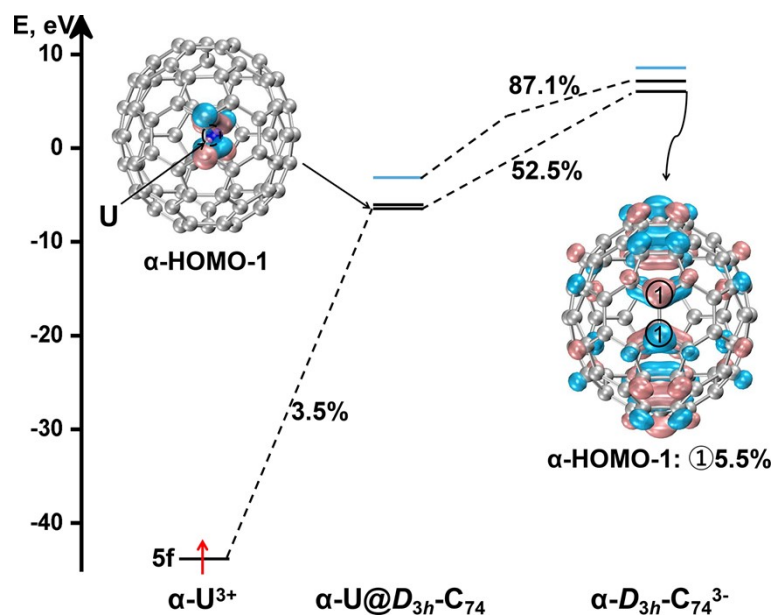

**Fig. S13** Orbital interaction diagrams based on metal cation and cage anion of  $U@D_{3h}-C_{74}$ . For clarity, only the occupied molecular orbitals with significant overlaps between metal and cage are shown with other orbitals and electrons omitted.

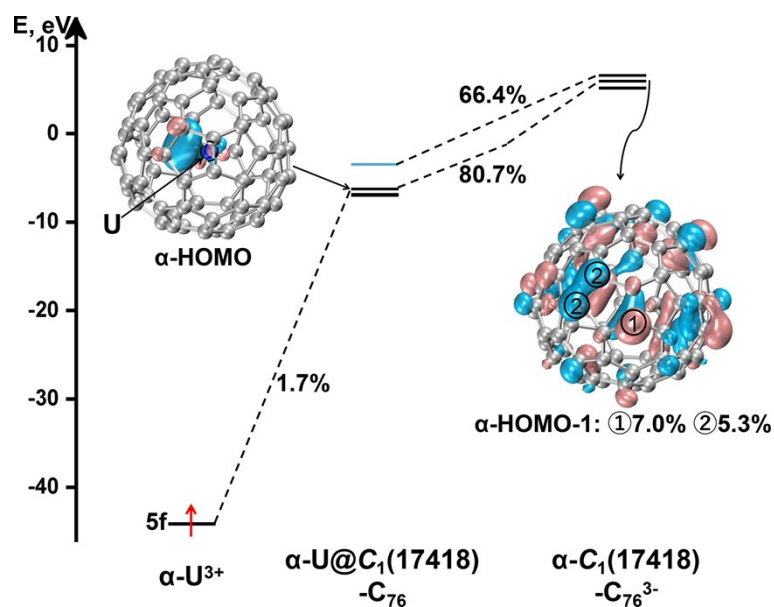

**Fig. S14** Orbital interaction diagrams based on metal cation and cage anion of  $U@C_1(17418)-C_{76}$ . For clarity, only the occupied molecular orbitals with significant

overlaps between metal and cage are shown with other orbitals and electrons omitted.

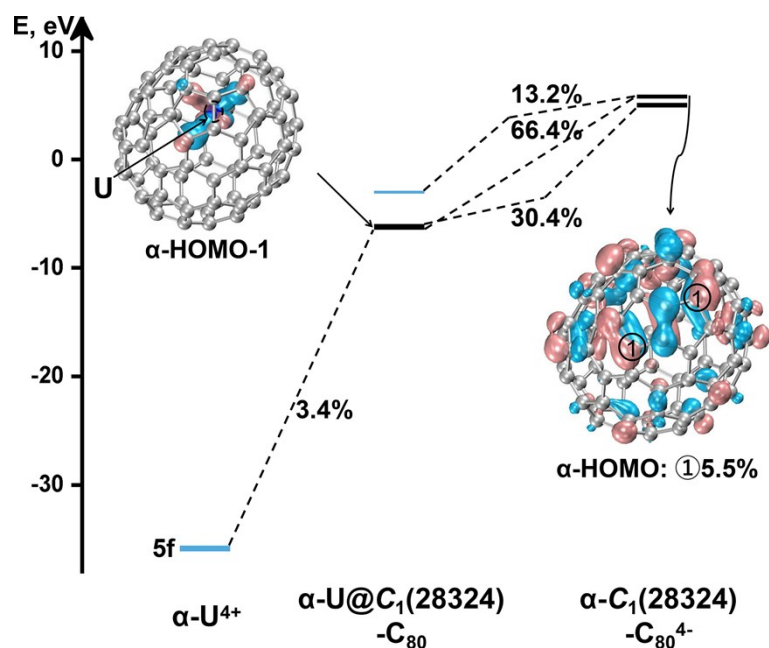

**Fig. S15** Orbital interaction diagrams based on metal cation and cage anion of  $U@C_1(28324)\text{-C}_{80}$ . For clarity, only the occupied molecular orbitals with significant overlaps between metal and cage are shown with other orbitals and electrons omitted.

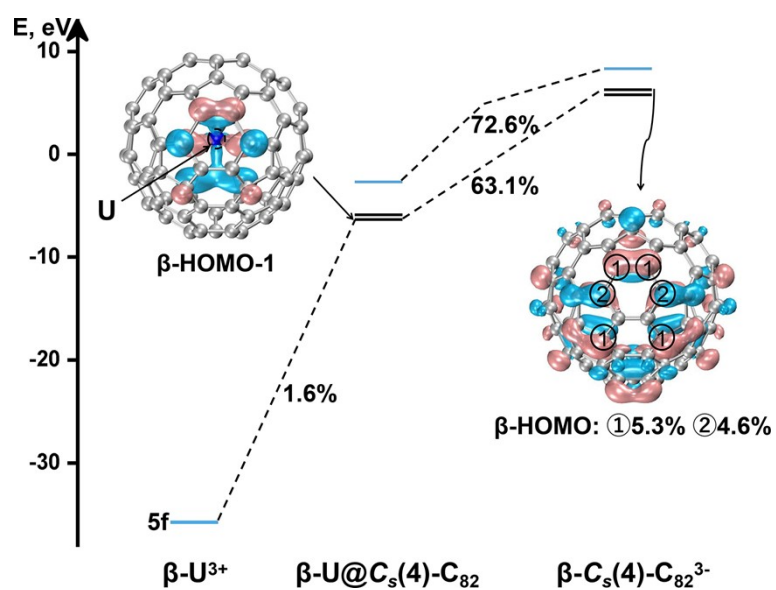

**Fig. S16** Orbital interaction diagrams based on metal cation and cage anion of



$U@C_5(4)-C_{82}$ . For clarity, only the occupied molecular orbitals with significant overlaps between metal and cage are shown with other orbitals and electrons omitted.

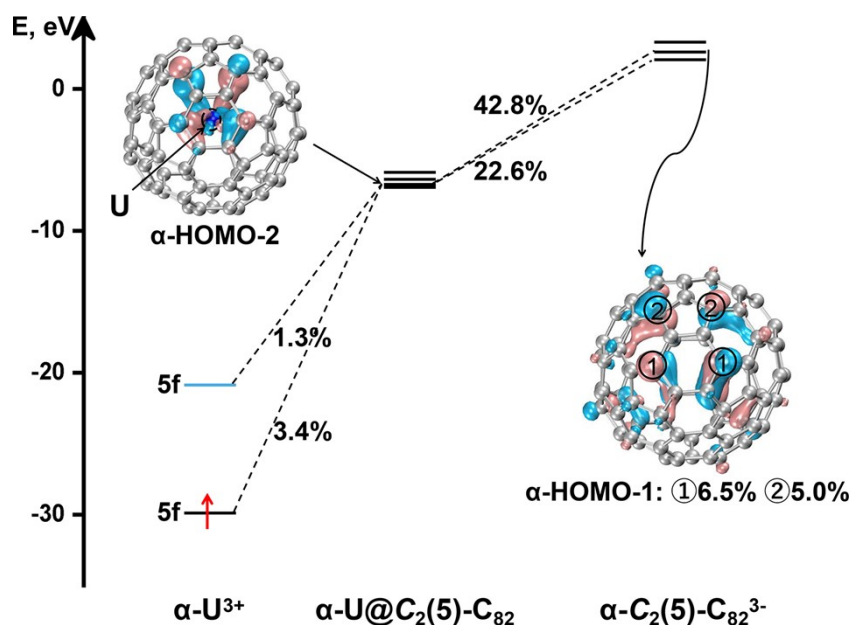

**Fig. S17** Orbital interaction diagrams based on metal cation and cage anion of  $U@C_2(5)-C_{82}$ . For clarity, only the occupied molecular orbitals with significant overlaps between metal and cage are shown with other orbitals and electrons omitted.

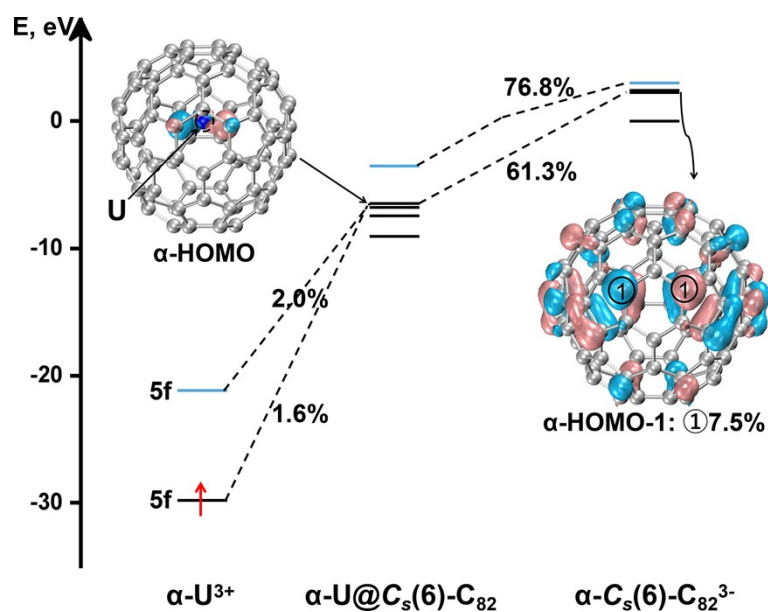

**Fig. S18** Orbital interaction diagrams based on metal cation and cage anion of  $U@C_s(6)-C_{82}$ . For clarity, only the occupied molecular orbitals with significant overlaps between metal and cage are shown with other orbitals and electrons omitted.

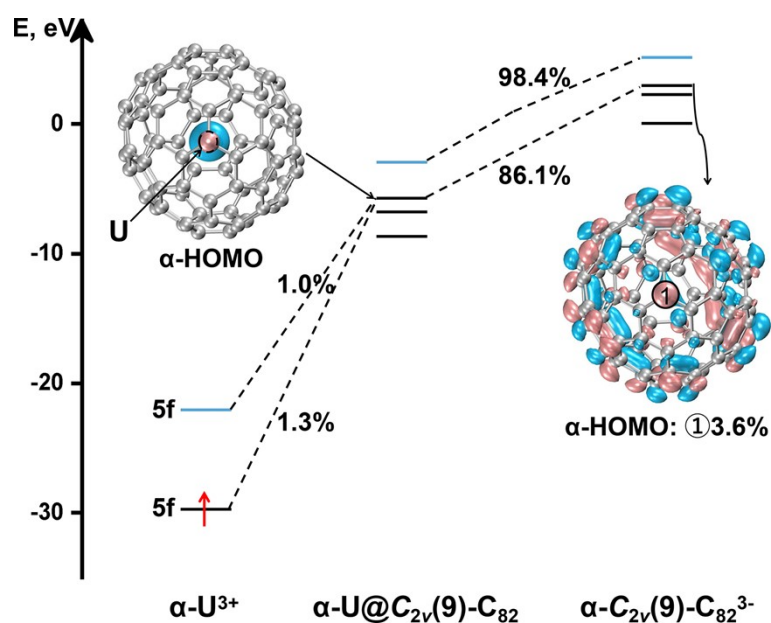

**Fig. S19** Orbital interaction diagrams based on metal cation and cage anion of  $U@C_{2v}(9)-C_{82}$ . For clarity, only the occupied molecular orbitals with significant overlaps between metal and cage are shown with other orbitals and electrons omitted.

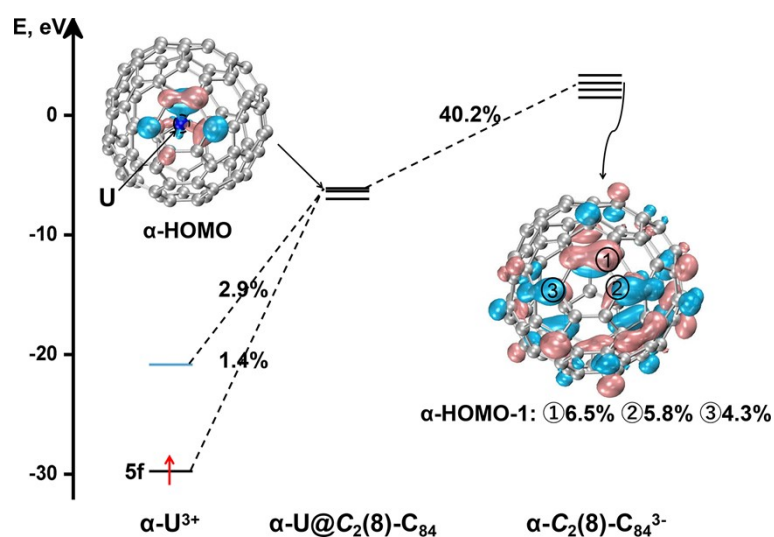

**Fig. S20** Orbital interaction diagrams based on metal cation and cage anion of  $U@C_2(8)-C_{84}$ . For clarity, only the occupied molecular orbitals with significant

overlaps between metal and cage are shown with other orbitals and electrons omitted.

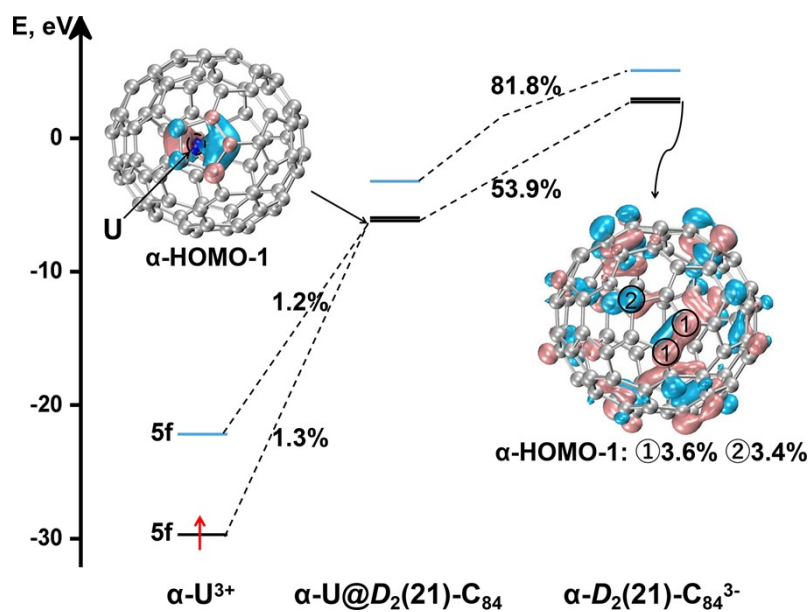

**Fig. S21** Orbital interaction diagrams based on metal cation and cage anion of  $\text{U@D}_2(21)\text{-C}_{84}$ . For clarity, only the occupied molecular orbitals with significant overlaps between metal and cage are shown with other orbitals and electrons omitted.

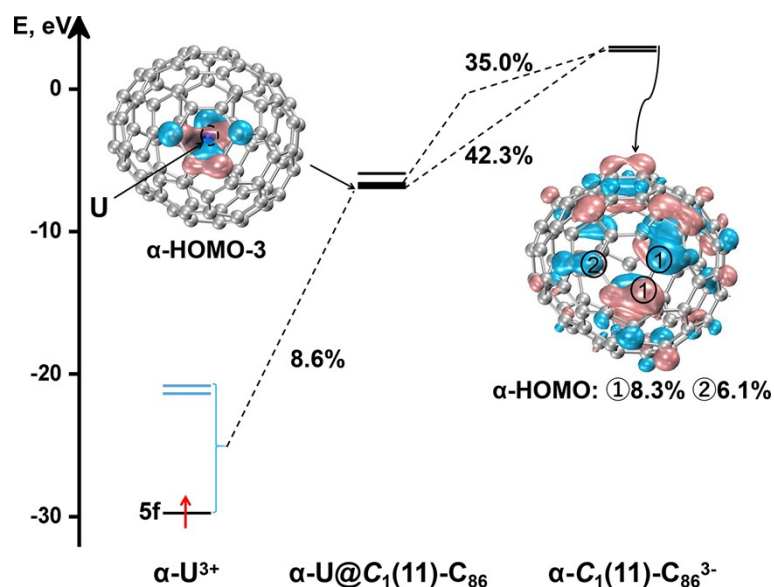

**Fig. S22** Orbital interaction diagrams based on metal cation and cage anion of  $\text{U@C}_1(11)\text{-C}_{86}$ . For clarity, only the occupied molecular orbitals with significant overlaps between metal and cage are shown with other orbitals and electrons omitted.

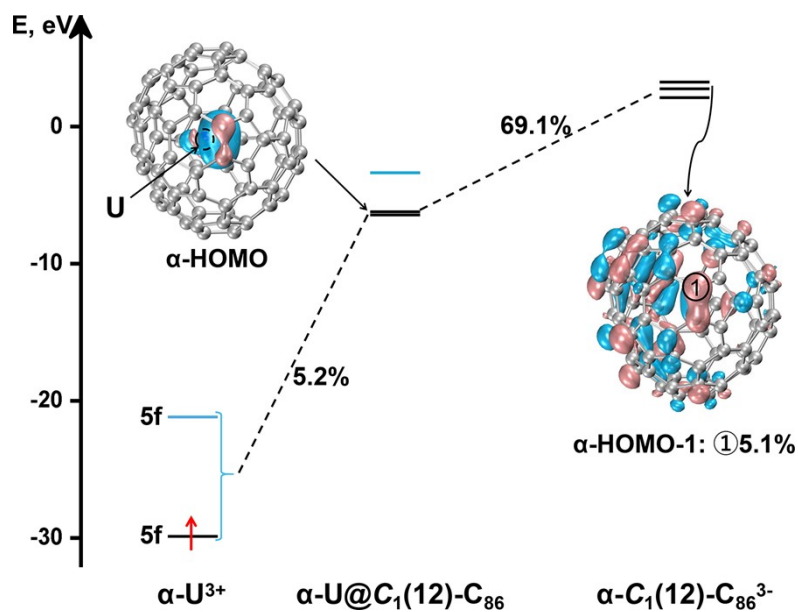

**Fig. S23** Orbital interaction diagrams based on metal cation and cage anion of  $\text{U@C}_1(12)\text{-C}_{86}$ . For clarity, only the occupied molecular orbitals with significant overlaps between metal and cage are shown with other orbitals and electrons omitted.

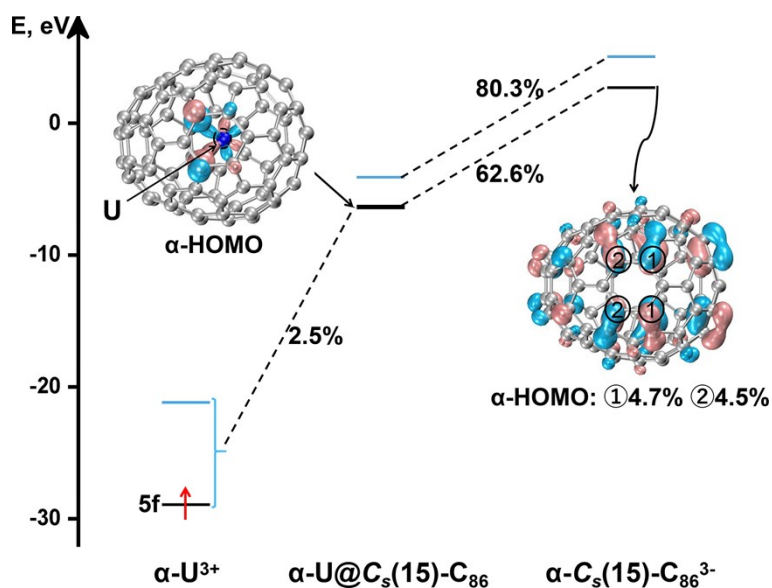

**Fig. S24** Orbital interaction diagrams based on metal cation and cage anion of  $\text{U@C}_s(15)\text{-C}_{86}$ . For clarity, only the occupied molecular orbitals with significant overlaps between metal and cage are shown with other orbitals and electrons omitted.

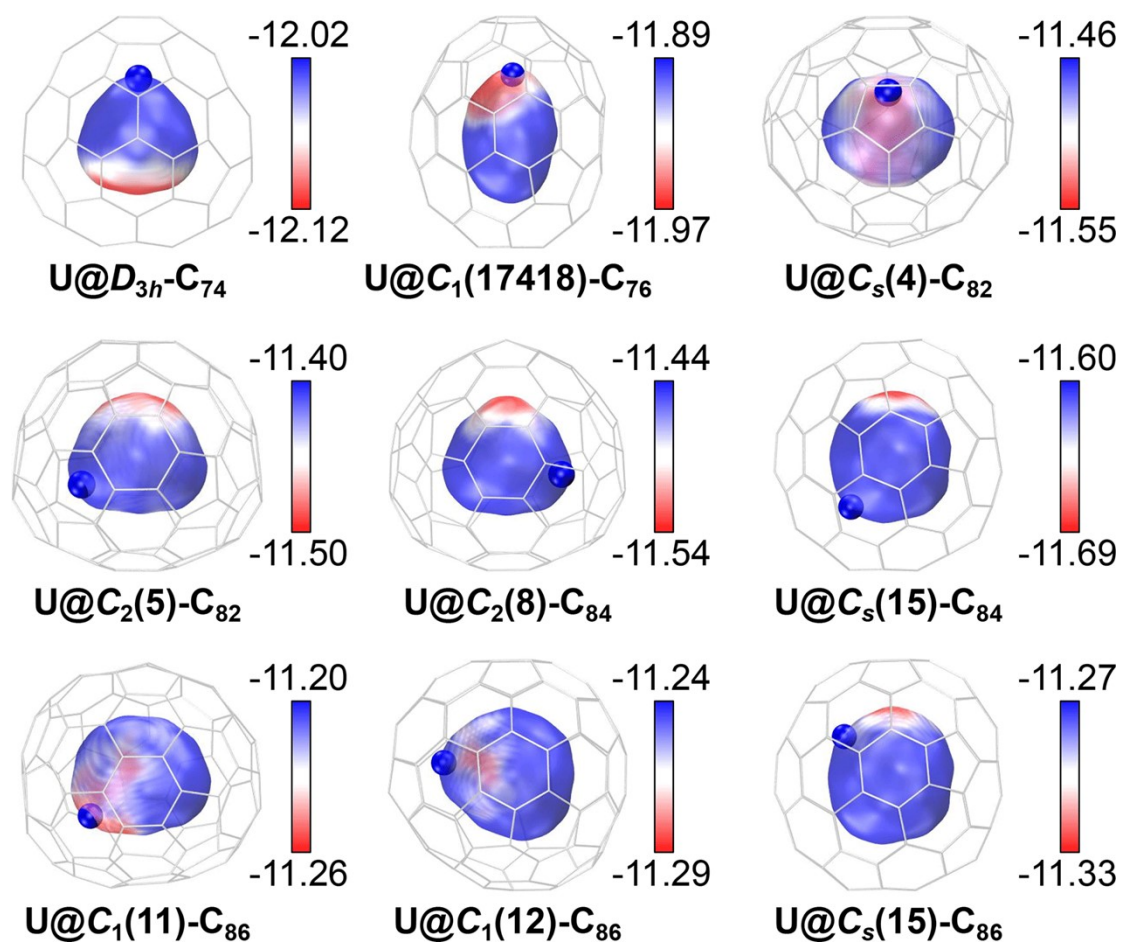

**Fig. S25** The overlaps of the structures of nine U-based mono-EMFs with the ESP isosurfaces (eV) inside the corresponding  $C_{2n}^+$  empty cages (PBE level).

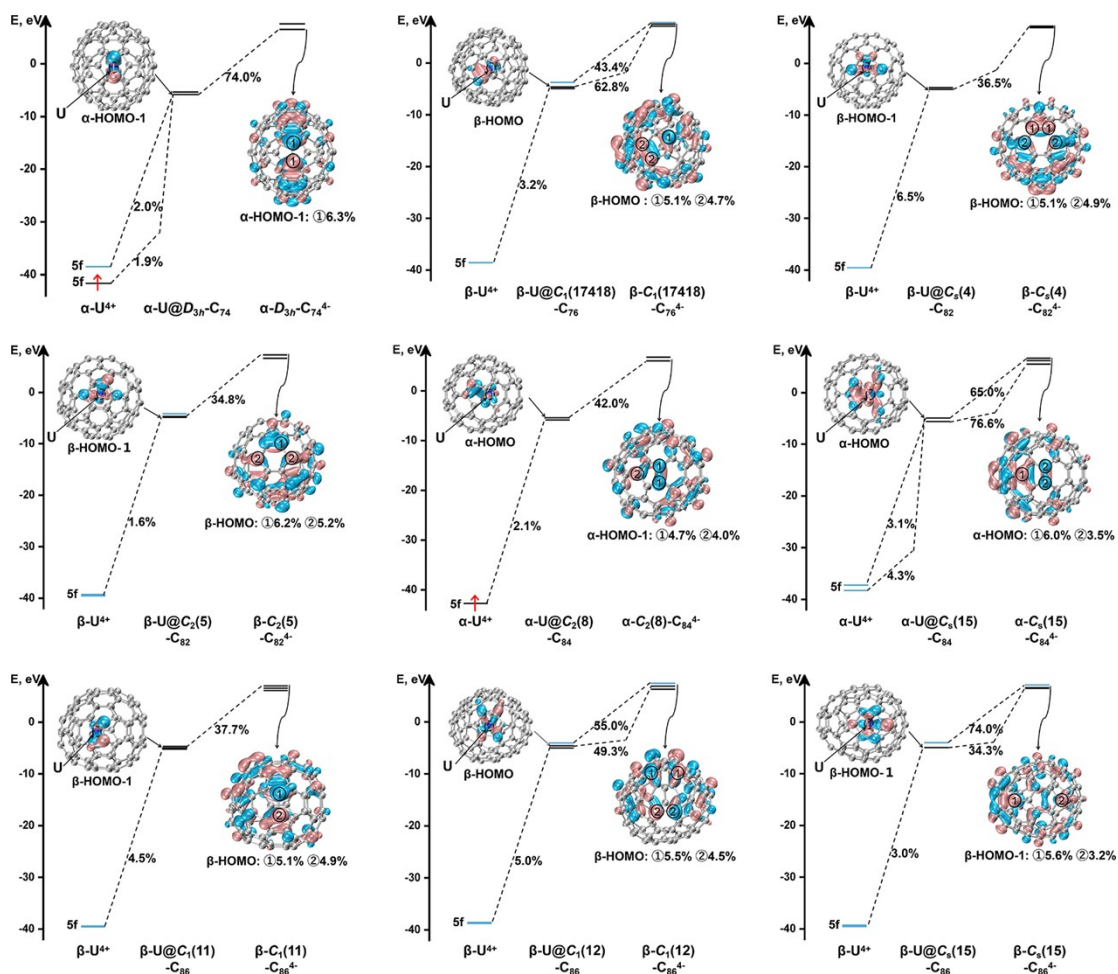

**Fig. S26** Orbital interaction diagrams based on metal cation and cage anion of nine U-based mono-EMFs (PBE level). For clarity, only the occupied molecular orbitals with significant overlaps between metal and cage are shown with other orbitals and electrons omitted.

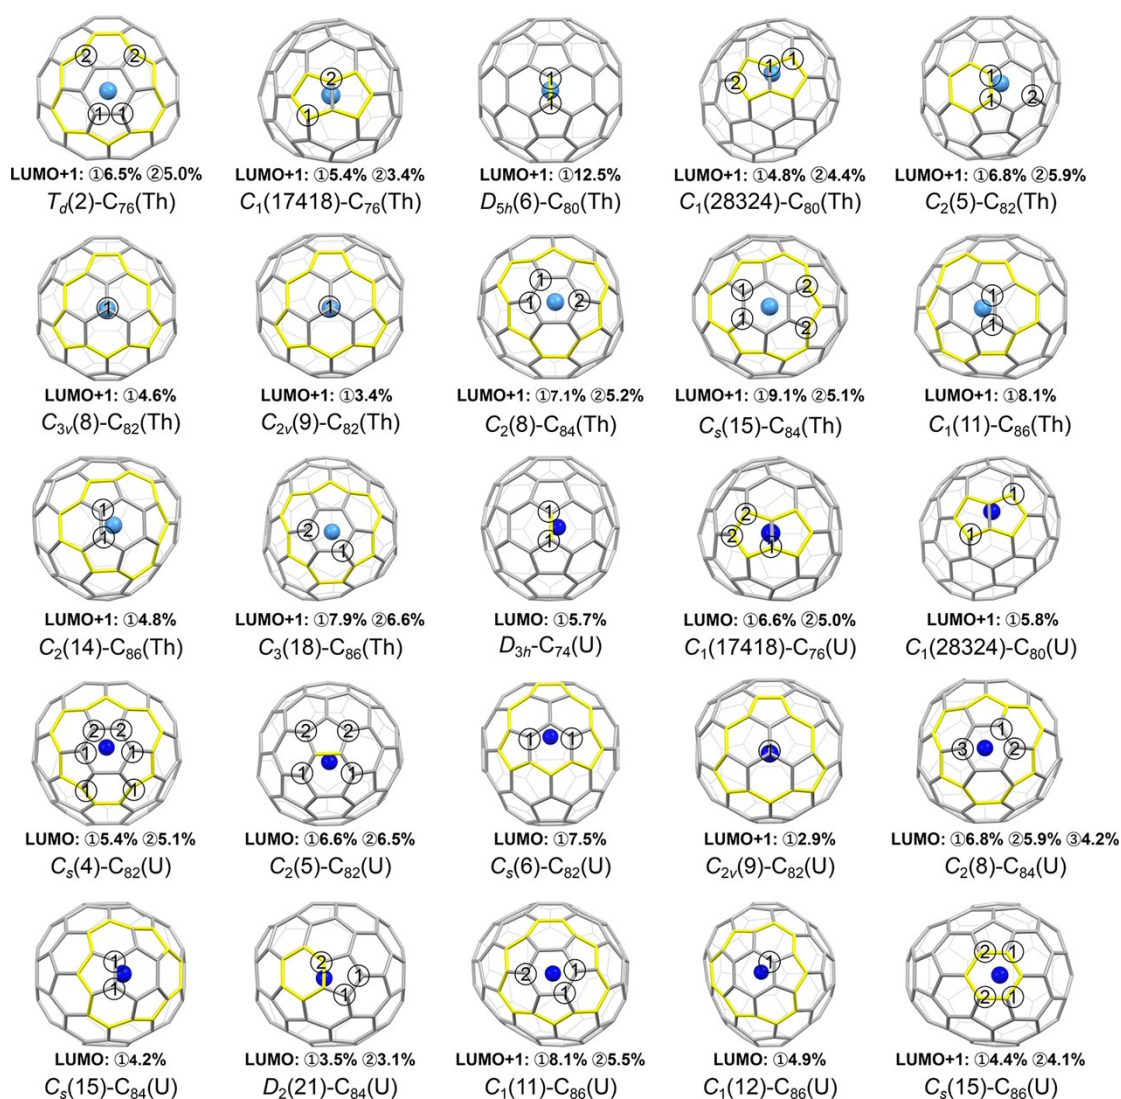

**Fig. S27** Overlaps between the structures of all actinide mono-EMFs and the orbital composition analyses of corresponding neutral hollow cages. The carbon atoms that contribute (in %) most to the corresponding orbitals are numbered. The cage segments interacting with the metals in the single crystal structures are circled by yellow. Th: light blue; U: dark blue.

## References

- 1 M. Jin, J. Zhuang, Y. Wang, W. Yang, X. Liu and N. Chen, Th@ $T_d(19151)$ -C<sub>76</sub>: a highly symmetric fullerene cage stabilized by a tetravalent actinide metal ion, *Inorg. Chem.*, 2019, **58**, 16722-16726.
- 2 P. Jin, C. Liu, Y. Li, L. Li and Y. Zhao, Th@C<sub>76</sub>. Computational characterization of larger

- 
- actinide endohedral fullerenes, *Int. J. Quantum Chem.*, 2018, **118**, e25501.
- 3 P. Zhao, X. Zhao and M. Ehara, Theoretical insights into monometallofullerene Th@C<sub>76</sub>: strong covalent interaction between thorium and the carbon cage, *Inorg. Chem.*, 2018, **57**, 2961-2964.
  - 4 Y. Xia, Y. Shen, Y.-R. Yao, Q. Meng and N. Chen, Synthesis and characterization of a novel non-isolated-pentagon-rule isomer of Th@C<sub>76</sub>: Th@C<sub>1</sub>(17418)-C<sub>76</sub>, *Inorganics*, 2023, **11**, 422.
  - 5 Y. Yan, R. Morales-Martínez, J. Zhuang, Y.-R. Yao, X. Li, J. M. Poblet, A. Rodríguez-Forteza and N. Chen, Th@D<sub>5h</sub>(6)-C<sub>80</sub>: a highly symmetric fullerene cage stabilized by a single metal ion, *Chem. Commun.*, 2021, **57**, 6624-6627.
  - 6 W. Cai, L. Abella, J. Zhuang, X. Zhang, L. Feng, Y. Wang, R. Morales-Martínez, R. Esper, M. Boero, A. Metta-Magaña, A. Rodríguez-Forteza, J. M. Poblet, L. Echegoyen and N. Chen, Synthesis and characterization of non-isolated-pentagon-rule actinide endohedral metallofullerenes U@C<sub>1</sub>(17418)-C<sub>76</sub>, U@C<sub>1</sub>(28324)-C<sub>80</sub>, and Th@C<sub>1</sub>(28324)-C<sub>80</sub>: low-symmetry cage selection directed by a tetravalent ion, *J. Am. Chem. Soc.*, 2018, **140**, 18039-8050.
  - 7 Q. Meng, R. Morales-Martínez, J. Zhuang, Y.-R. Yao, Y. Wang, L. Feng, J. M. Poblet, A. Rodríguez-Forteza and N. Chen, Synthesis and characterization of two isomers of Th@C<sub>82</sub>: Th@C<sub>2v</sub>(9)-C<sub>82</sub> and Th@C<sub>2</sub>(5)-C<sub>82</sub>, *Inorg. Chem.*, 2021, **60**, 11496-11502.
  - 8 Y. Wang, R. Morales-Martínez, X. Zhang, W. Yang, Y. Wang, A. Rodríguez-Forteza, J. M. Poblet, L. Feng, S. Wang and N. Chen, Unique four-electron metal-to-cage charge transfer of Th to a C<sub>82</sub> fullerene cage: complete structural characterization of Th@C<sub>3v</sub>(8)-C<sub>82</sub>, *J. Am. Chem. Soc.*, 2017, **139**, 5110-5116.
  - 9 X. Liu, B. Li, W. Yang, Y.-R. Yao, L. Yang, J. Zhuang, X. Li, P. Jin and N. Chen, Synthesis and characterization of carbene derivatives of Th@C<sub>3v</sub>(8)-C<sub>82</sub> and U@C<sub>2v</sub>(9)-C<sub>82</sub>: exceptional chemical properties induced by strong actinide-carbon cage interaction, *Chem. Sci.*, 2020, **12**, 2488-2497.
  - 10 T. Cao, Q. Meng, Z. Fu, Y. Shen, Y. Yan, Q. Wang, B. Zhao, W. Wang, K. Merimi, A. Rodríguez-Forteza, Y.-R. Yao and N. Chen, Th@C<sub>2</sub>(8)-C<sub>84</sub> and Th@C<sub>s</sub>(15)-C<sub>84</sub>: impact of actinide metal ions on the electronic structures of actinide endohedral metallofullerenes, *Inorg. Chem. Front.*, 2023, **10**, 6901-6908.
  - 11 Y. Wang, R. Morales-Martínez, W. Cai, J. Zhuang, W. Yang, L. Echegoyen, J. M. Poblet, A. Rodríguez-Forteza and N. Chen, Th@C<sub>1</sub>(11)-C<sub>86</sub>: an actinide encapsulated in an unexpected C<sub>86</sub> fullerene cage, *Chem. Commun.*, 2019, **55**, 9271-9274.
  - 12 J. Qiu, L. Zheng, Y. Roselló, K. Merimi, Y.-R. Yao, Z. Cao, Z. He, J. M. Poblet, A. Rodríguez-Forteza and N. Chen, Th@C<sub>2</sub>(14)-C<sub>86</sub> and Th@C<sub>3</sub>(18)-C<sub>86</sub>: two missing C<sub>86</sub> isomers stabilized by the encapsulation of thorium, *Inorg. Chem. Front.*, 2024, **11**, 3578-3584.
  - 13 W. Cai, R. Morales-Martínez, X. Zhang, D. Najera, E. L. Romero, A. Metta-Magaña, A. Rodríguez-Forteza, S. Fortier, N. Chen, J. M. Poblet and L. Echegoyen, Single crystal structures and theoretical calculations of uranium endohedral metallofullerenes (U@C<sub>2n</sub>, 2n = 74, 82)



- 
- show cage isomer dependent oxidation states for U, *Chem. Sci.*, 2017, **8**, 5282-5290.
- 14 Y.-X. Gu, Q.-Z. Li, P. Zhao and X. Zhao, Encapsulation of monometal uranium into fullerenes  $C_{2n}$  ( $2n = 70-74$ ): Important ionic  $U^{4+}C_{2n}^{4-}$  characters and covalent U-cage bonding interactions, *Inorg. Chem.*, 2019, **58**, 10629-10636.
- 15 Q. Wang, L. Abella, Y.-R. Yao, Y. Yan, D. Torrens, Q. Meng, S. Yang, J. M. Poblet, A. Rodríguez-Forteza and N. Chen,  $U@C_{s(4)}-C_{82}$ : a different cage isomer with reactivity controlled by U-sumanene interaction, *Inorg. Chem.*, 2023, **62**, 12976-12988.
- 16 Y.-R. Yao, Y. Roselló, L. Ma, A. R. Puente Santiago, A. Metta-Magaña, N. Chen, A. Rodríguez-Forteza, J. M. Poblet and L. Echegoyen, Crystallographic characterization of  $U@C_{2n}$  ( $2n = 82-86$ ): insights about metal-cage interactions for mono-metallofullerenes, *J. Am. Chem. Soc.*, 2021, **143**, 15309-15318.
- 17 W. Cai, J. Alvarado, A. Metta-Magaña, N. Chen and L. Echegoyen, Interconversions between uranium mono-metallofullerenes: mechanistic implications and role of asymmetric cages, *J. Am. Chem. Soc.*, 2020, **142**, 13112-13119.
